# Supplementary material
Source: PubMed Central journal article supplement (PMC3472518)
Supplement: Supp_Fig1.pdf [file Supp_Fig1.pdf]

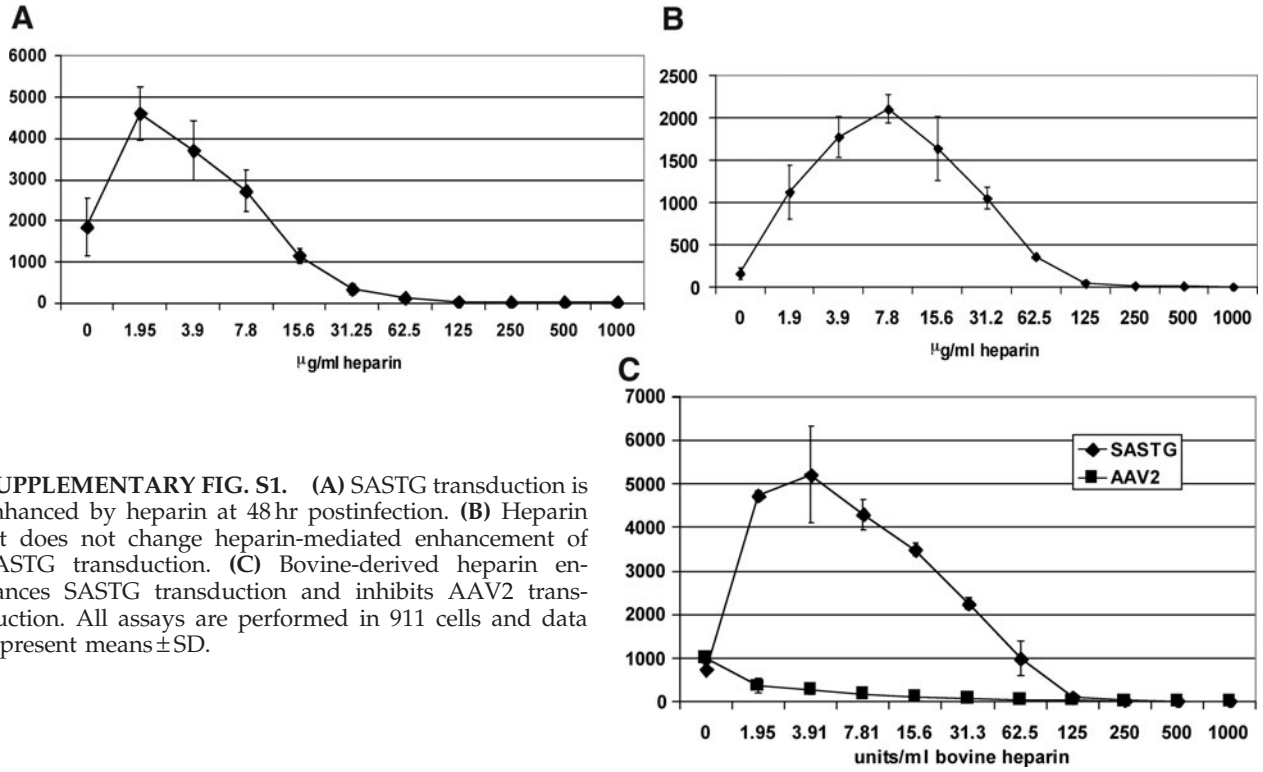

**SUPPLEMENTARY FIG. S1.** (A) SASTG transduction is enhanced by heparin at 48 hr postinfection. (B) Heparin lot does not change heparin-mediated enhancement of SASTG transduction. (C) Bovine-derived heparin enhances SASTG transduction and inhibits AAV2 transduction. All assays are performed in 911 cells and data represent means  $\pm$  SD.
