# Supplementary material
Source: PubMed Central journal article supplement (PMC3472518)
Supplement: Supp_Fig2.pdf [file Supp_Fig2.pdf]

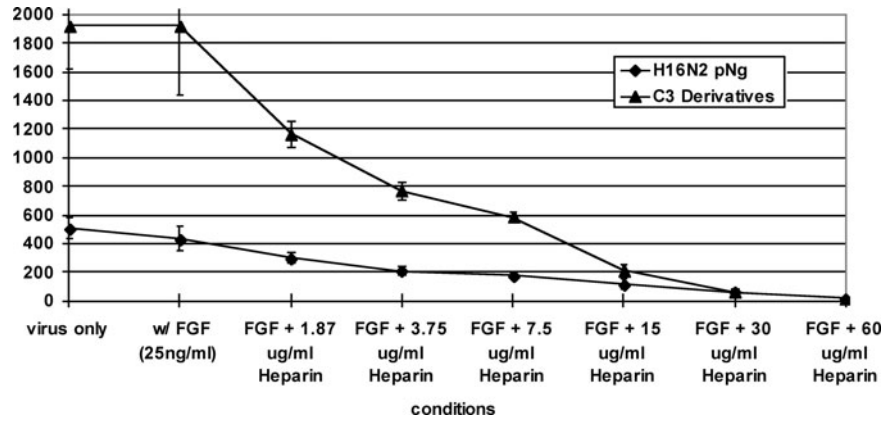

**SUPPLEMENTARY FIG. S2.** Infection of H16N2 C3 (constitutively active) and H16N2 parental cells (no FGFR2) with SASTG in the presence and absence of FGF1 (50 ng/ml), over a range of heparin concentrations. Data represent means  $\pm$  SD.
