# Supplementary material
Source: PubMed Central journal article supplement (PMC3472518)
Supplement: Supp_Fig3.pdf [file Supp_Fig3.pdf]

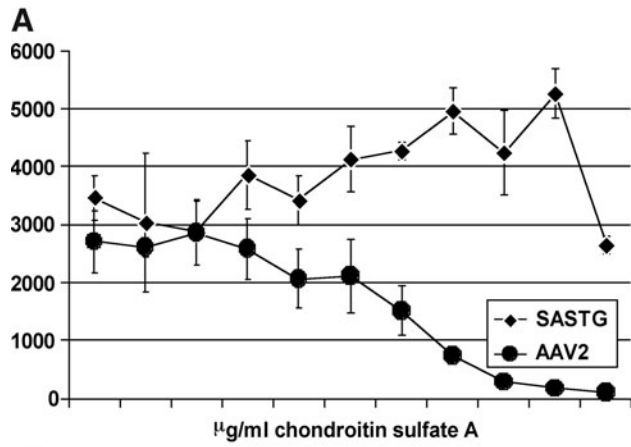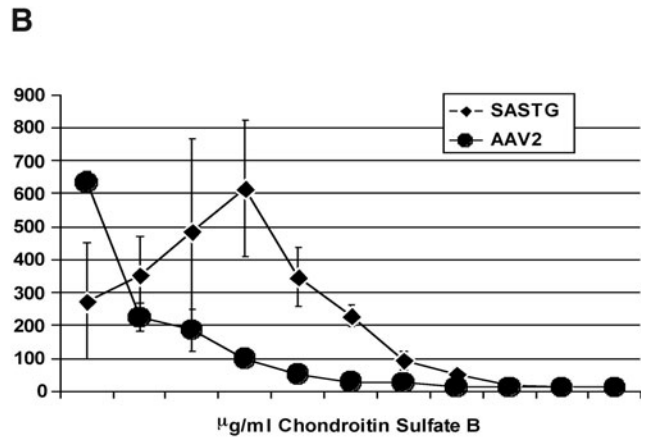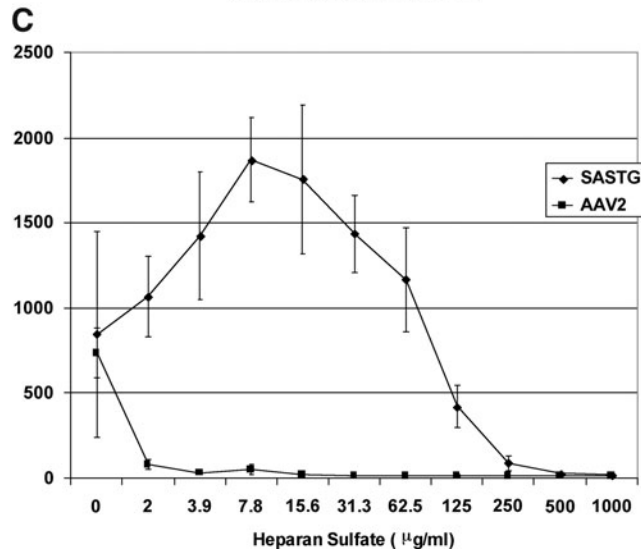

**SUPPLEMENTARY FIG. S3.** Evaluation of other GAGs in their ability to enhance SASTG expression and inhibit AAV2. Effect of (A) chondroitin sulfate A, (B) chondroitin sulfate B, and (C) heparan sulfate over a range of concentrations on AAV2 and SASTG infection of 911 cells. Data represent means  $\pm$  SD.
